# Supplementary material for: A Proteomic Investigation of Soluble Olfactory Proteins in Anopheles gambiae
Source: PubMed Central journal article supplement (PMC3839933; doi:10.1371/journal.pone.0075162), 2013-11-25

Source: Toni\_20100503\_GM\_Agam\_F\_01  
Scannumber: 7932  
Protein: Q8T6R5  
Peptide Score: 91.87  
Method: ITMS; CID; 1

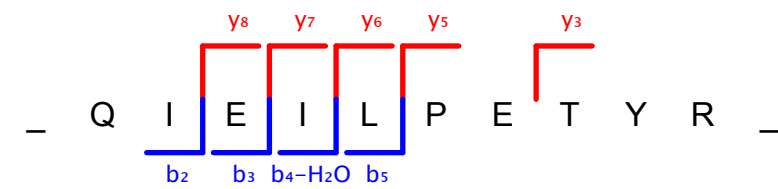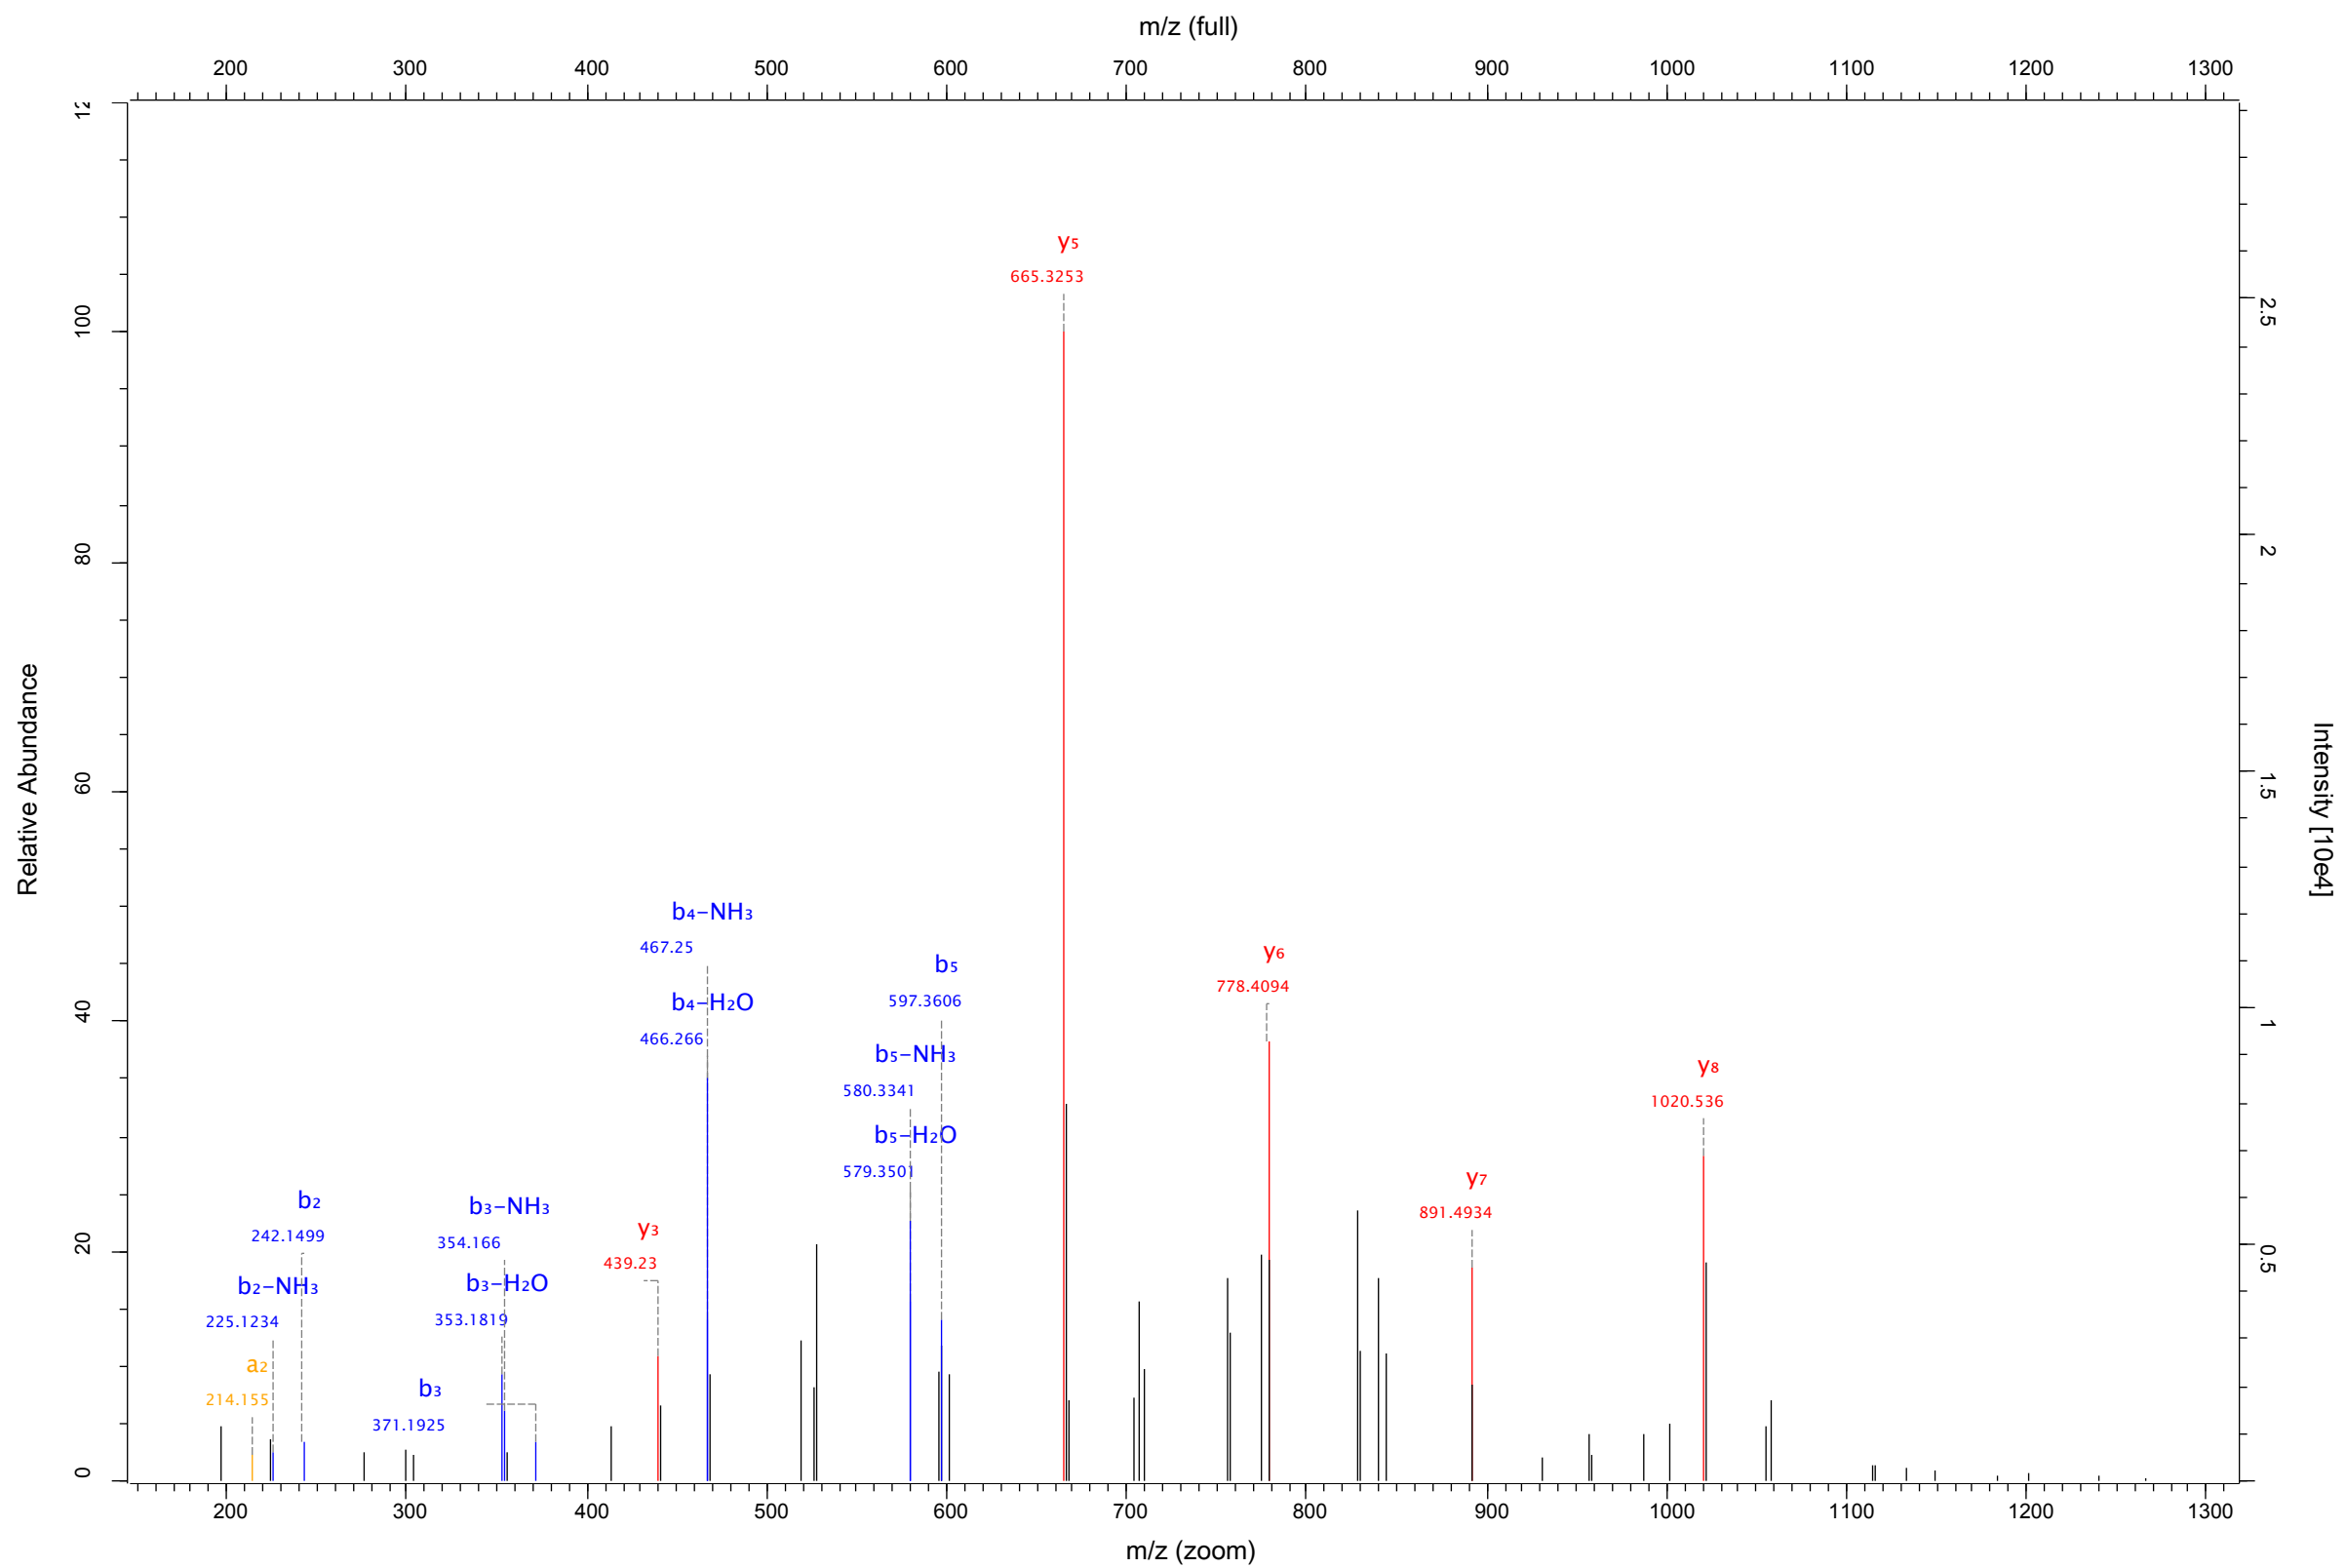

Supplement: pone.0075162.s002.pdf [file pone.0075162.s002.pdf]
